# Supplementary material
Source: publisher site journal article supplement (https://www.dovepress.com/article/466092)
Supplement: Supplementary file 1 [file get_supplementary_file.php]

**Costunolide Attenuates Renal Fibrosis, Inflammation and Ferroptosis by Inhibiting IKKβ/NF-κB Pathway in Chronic Kidney Disease**

Yang Zhao1,†, Yi-Han Wang2,†, Wei-Chao Tu1, Mu-Jun Lu3,4,*, Da-Wei Wang1,*, Yuan Shao1,*

*1Department of Urology, Ruijin Hospital, School of Medicine, Shanghai Jiao Tong University, Shanghai, China*

*2Department of Urology, Sixth People's Hospital South Campus Affiliated to Shanghai Jiao Tong University, Shanghai, China*

*3Department of Urology and Androloy, Renji Hospital, School of Medicine, Shanghai Jiao Tong University, Shanghai, China*

*4Shanghai Institute of Androloy, Shanghai, China*

*†These authors share the first authorship.*

***Co-corresponding author**

Da-Wei Wang, E-mail: [wdwrjhn@163.com;](mailto:wdwrjhn@163.com;) Mu-Jun Lu, E-mail: lumujun@163.com; Yuan Shao, E-mail: [shaoyuan10772@163.com](mailto:shaoyuan10772@163.com);

**
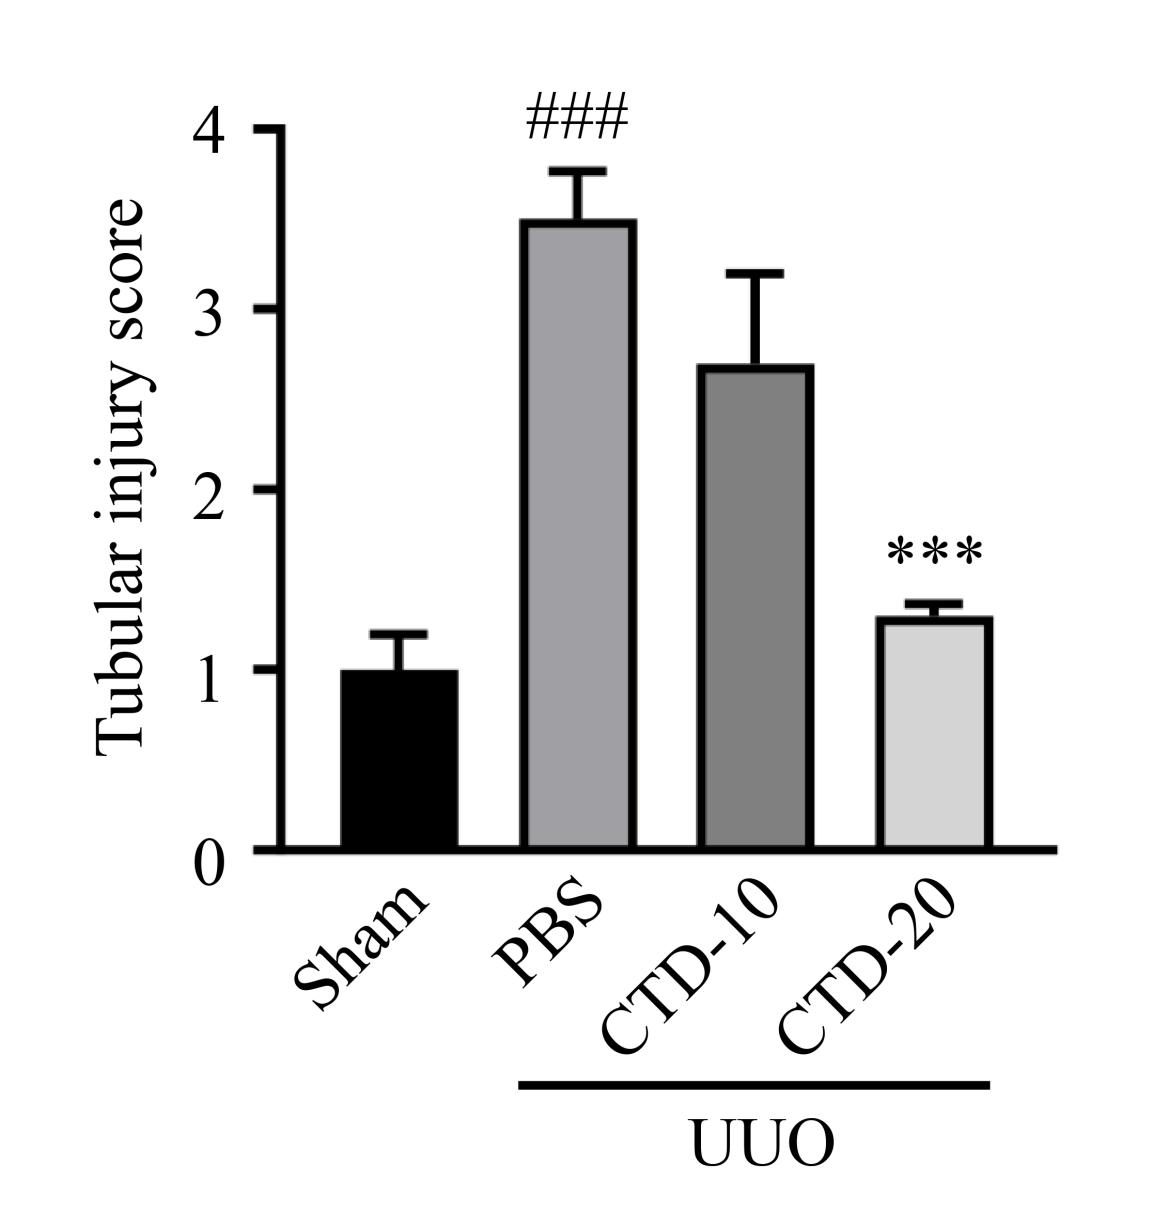
**

**Supplementary figure 1**. Tubular injury score of experimental mice. ### *P* < 0.001, compared to the sham group, *** *P* < 0.001, compared to the UUO group.

**
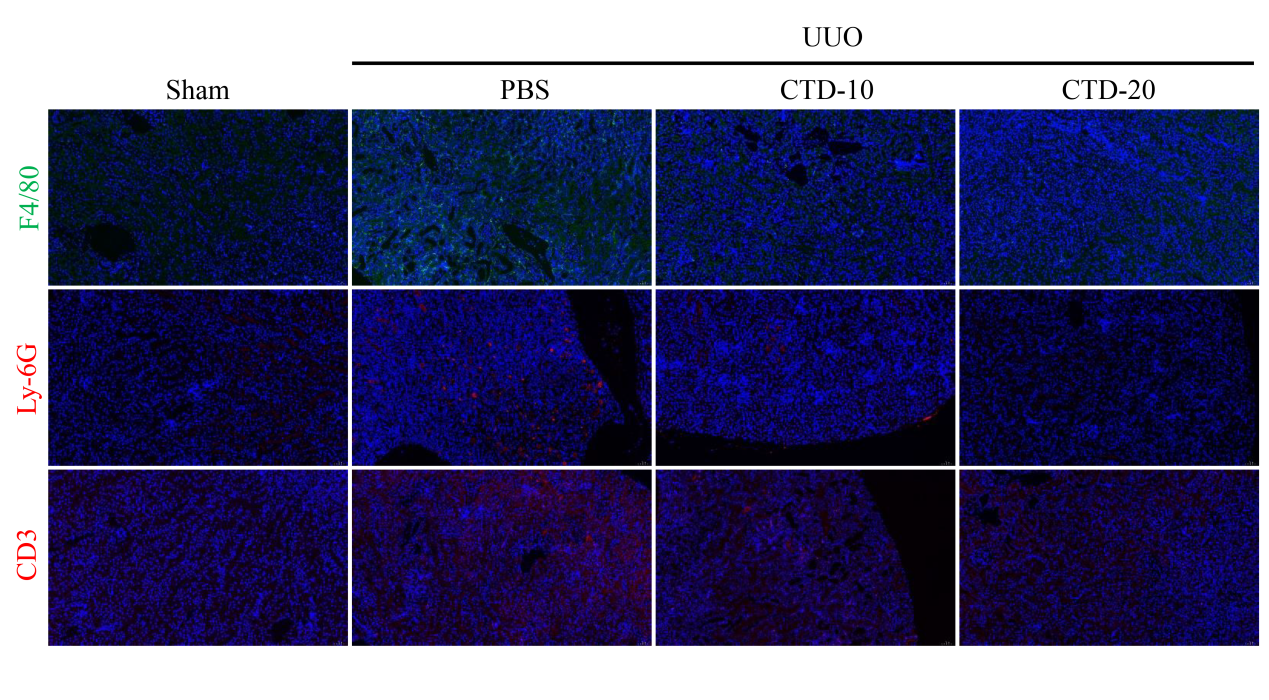
Supplementary figure 2**. Representative pictures of F4/80, Ly-6G, CD3 and IL-1β staining in kidneys, Scale bar: 100 μm.

**
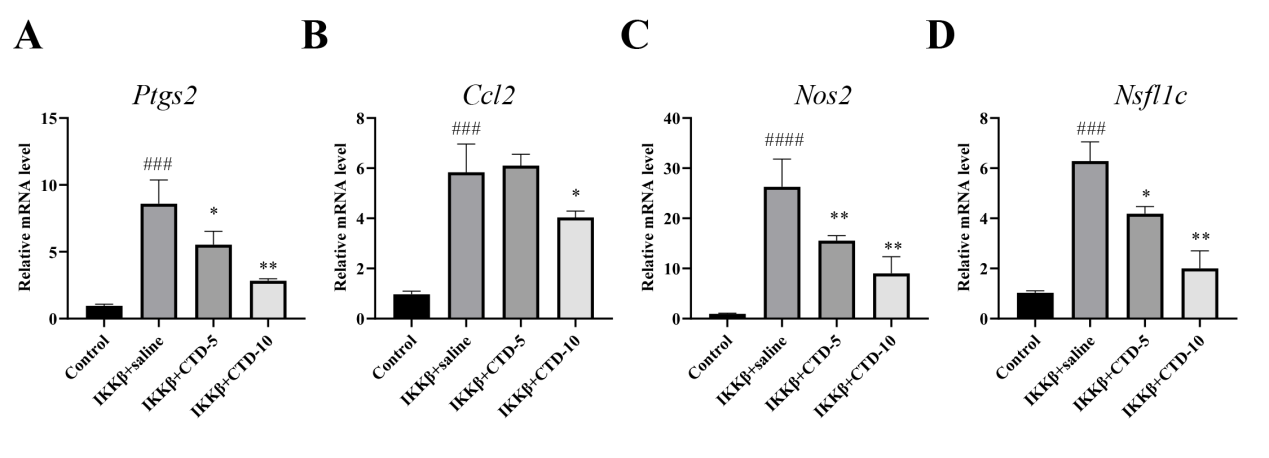
**

**Supplementary figure 3. CTD suppresses IKKβ-induced inflammatory response *in vitro*.** Quantitative analysis of mRNA expression of Ptgs2 (A), Ccl2 (B), Nos2 (C), and Nsfl1c (D) in each group, ### *P* < 0.001, #### *P* < 0.0001 compared to the control group; * *P* < 0.05, ** *P* < 0.01, compared to the IKKβ+saline group.

**
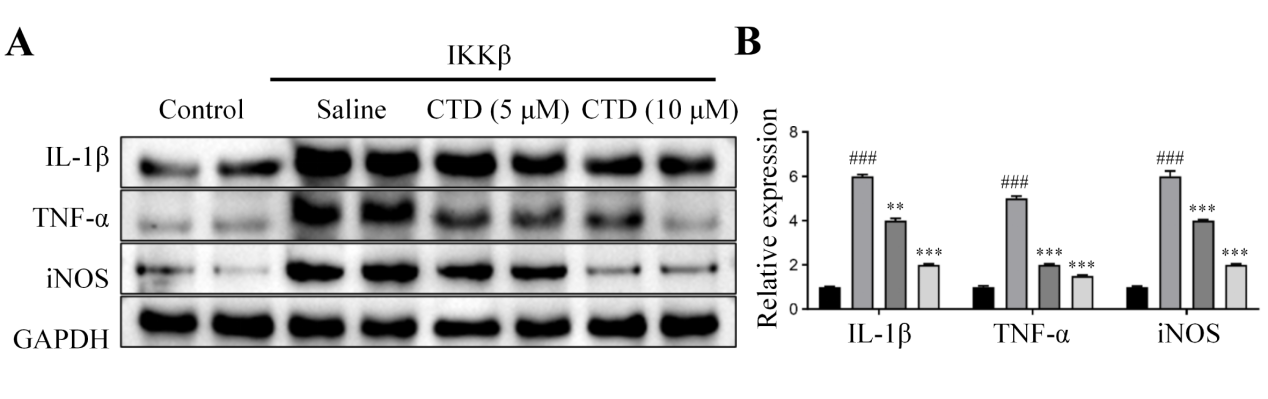
**

**Supplementary figure 4**. (A) western blot analysis of TNF-α, IL-1β and iNOS, (B) quantification of western blot results. ### *P* < 0.001, compared to the control group; ** *P* < 0.01, *** *P* < 0.001, compared to the IKKβ+saline group.
